# Supplementary material for: Modifier Effect in Silica-Supported FePO4 and Fe-Mo-O Catalysts for Propylene Glycol Oxidation
Source: MDPI journal article supplement (doi:10.3390/ma15051906), 2022-03-04
Supplement: s1 [file s1]

Supplementary

# Modifier Effect in Silica-Supported $\text{FePO}_4$ and Fe-Mo-O Catalysts for Propylene Glycol Oxidation

Darya Y. Savenko <sup>1</sup>, Mikhail A. Salaev <sup>1</sup>, Valerii V. Dutov <sup>1</sup>, Sergei A. Kulinich <sup>2,3</sup> and Olga V. Vodyankina <sup>1,\*</sup>

<sup>1</sup> Laboratory of Catalytic Research, Tomsk State University, 36 Lenin Avenue, 634050 Tomsk, Russia; darya\_ebert@mail.ru (D.Y.S.); mihan555@yandex.ru (M.A.S.); dutov\_valeriy@mail.ru (V.V.D.)

<sup>2</sup> Research Institute of Science & Technology, Tokai University, Hiratsuka 259-1292, Kanagawa, Japan; skulinich@tokai-u.jp

<sup>3</sup> School of Natural Sciences, Far Eastern Federal University, 690091 Vladivostok, Russia

\* Correspondence: vodyankina\_o@mail.ru

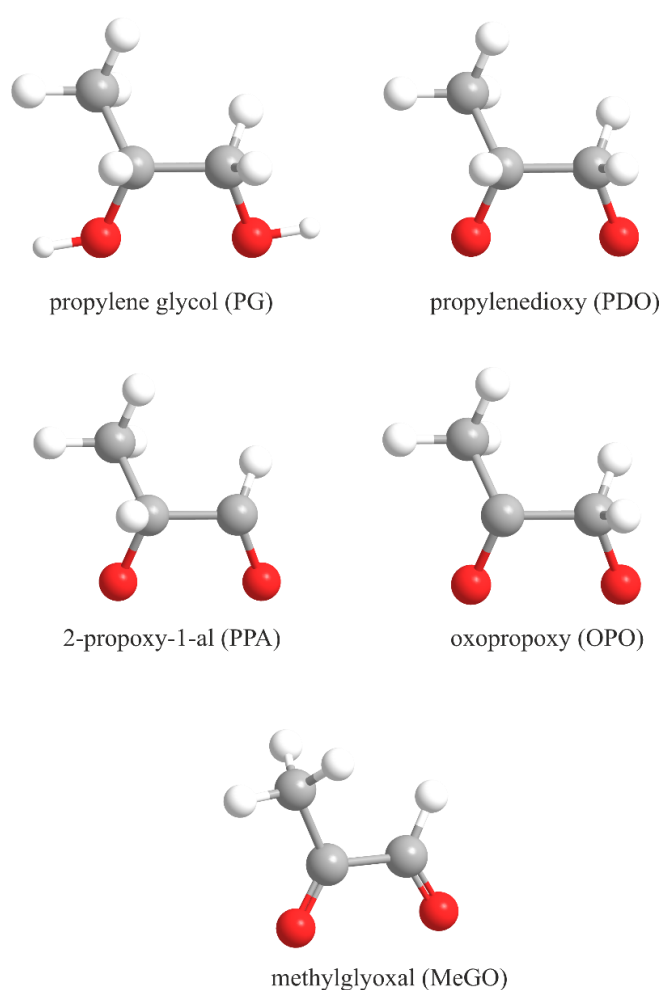

**Figure S1.** Geometries of substrates.

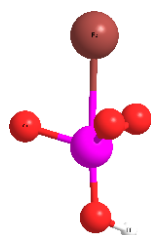

**Figure S2.** Calculated structure of iron phosphate ( $\text{FePO}_4\text{H}$ ).

**Table S1.** DFT-optimized Cartesian coordinates for the main FePO<sub>4</sub>-based models.

| Element                            | X         | Y         | Z         |
|------------------------------------|-----------|-----------|-----------|
| FePO <sub>4</sub> H                |           |           |           |
| Fe                                 | −6.095141 | −0.493745 | −1.068161 |
| P                                  | −8.084016 | 0.186545  | −1.289914 |
| O                                  | −9.583237 | 1.287554  | −1.021465 |
| O                                  | −7.445038 | 0.695499  | −1.450785 |
| O                                  | −7.445038 | −0.584438 | −2.504909 |
| O                                  | −7.793282 | −0.825541 | −0.119970 |
| H                                  | −9.660208 | 1.665827  | −1.414896 |
| FePO <sub>4</sub> H+O <sub>2</sub> |           |           |           |
| Fe                                 | −0.482871 | −1.860748 | −0.138670 |
| P                                  | −2.501492 | −1.065480 | 0.116941  |
| O                                  | −1.363558 | −1.065480 | 0.305461  |
| O                                  | −4.002781 | −0.574747 | 0.131324  |
| O                                  | −1.936945 | −1.732065 | −1.251926 |
| O                                  | −2.139232 | −2.231328 | 1.067269  |
| H                                  | −4.137853 | 0.348205  | −0.153127 |
| O                                  | 0.803925  | −2.807090 | 0.633210  |
| O                                  | 1.235807  | −1.598708 | 0.220019  |
| FePO <sub>4</sub> H+O              |           |           |           |
| Fe                                 | 1.488834  | 0.146322  | 0.331962  |
| P                                  | −0.567447 | 0.880776  | 0.102574  |
| O                                  | 0.563688  | 1.939321  | 0.376228  |
| O                                  | −2.052713 | 1.383365  | −0.063492 |
| O                                  | 0.100124  | 0.100582  | −1.089412 |
| O                                  | −0.251167 | −0.137468 | 1.257528  |
| H                                  | −2.159088 | 2.352304  | −0.025212 |
| O                                  | 2.917369  | −0.387401 | 0.487925  |
| FePO <sub>4</sub> H+PG             |           |           |           |
| C                                  | 1.571481  | −0.495553 | −0.029929 |
| C                                  | 1.441737  | 0.962265  | 0.394182  |
| C                                  | 2.098614  | 1.924530  | −0.585656 |
| O                                  | 0.800839  | −1.270212 | 0.927829  |
| O                                  | 0.003111  | 1.189987  | 0.463575  |
| H                                  | 2.619547  | −0.809562 | 0.004743  |
| H                                  | 1.151500  | −0.641255 | −1.029846 |
| H                                  | 1.860847  | 1.080216  | 1.402027  |
| H                                  | 1.961805  | 2.961124  | −0.260028 |
| H                                  | 3.176075  | 1.737718  | −0.641895 |
| H                                  | 1.666148  | 1.815342  | −1.584078 |
| H                                  | 0.650792  | −2.172383 | 0.585255  |
| H                                  | −0.213111 | 2.079279  | 0.787550  |
| Fe                                 | −1.068256 | −0.497643 | 0.879737  |
| P                                  | −2.723857 | −1.451155 | −0.118861 |
| O                                  | −3.114542 | −0.079440 | 0.501274  |
| O                                  | −3.913531 | −2.197056 | −0.905439 |
| O                                  | −1.451781 | −1.123464 | −0.993036 |
| O                                  | −2.086522 | −2.259924 | 1.056698  |
| H                                  | −4.699197 | −1.626212 | −0.961303 |
| FePO <sub>4</sub> H+O+PG           |           |           |           |
| C                                  | 2.324294  | 0.835031  | 0.133313  |
| C                                  | 2.401245  | 2.308005  | 0.548118  |
| C                                  | 1.210433  | 3.157593  | 0.115396  |
| O                                  | 1.412605  | 0.139719  | 1.044258  |
| O                                  | 2.534716  | 2.248188  | 1.988590  |
| H                                  | 3.296713  | 0.346316  | 0.234695  |

|                           |           |           |           |
|---------------------------|-----------|-----------|-----------|
| H                         | 1.929450  | 0.706096  | −0.873623 |
| H                         | 3.326143  | 2.716190  | 0.118977  |
| H                         | 1.344825  | 4.192215  | 0.453369  |
| H                         | 1.126606  | 3.177358  | −0.974931 |
| H                         | 0.261669  | 2.784894  | 0.509003  |
| H                         | 1.475623  | 0.603476  | 1.911025  |
| H                         | 2.280455  | 3.105016  | 2.366528  |
| Fe                        | −0.145572 | −0.821914 | 0.544418  |
| P                         | −1.859385 | 0.646332  | −0.581660 |
| O                         | −2.048805 | 2.101522  | −0.791765 |
| O                         | −3.057556 | −0.236502 | −1.215859 |
| O                         | −0.479385 | −0.020592 | −1.082337 |
| O                         | −1.658058 | 0.123250  | 0.937200  |
| H                         | −3.728278 | 0.343862  | −1.614928 |
| O                         | −0.120837 | −2.356057 | 0.753114  |
| FePO <sub>4</sub> H+PDO   |           |           |           |
| C                         | −3.681492 | −2.700196 | −0.901429 |
| C                         | −2.850783 | −1.416872 | −0.902028 |
| C                         | −2.114959 | −1.152360 | −2.219511 |
| O                         | −4.993384 | −2.343711 | −1.373071 |
| O                         | −3.804839 | −0.356335 | −0.659984 |
| H                         | −3.790314 | −3.100634 | 0.114714  |
| H                         | −3.293671 | −3.494102 | −1.549744 |
| H                         | −2.136616 | −1.378783 | −0.069804 |
| H                         | −1.670267 | −0.154039 | −2.206564 |
| H                         | −1.315347 | −1.888218 | −2.353283 |
| H                         | −2.801967 | −1.219488 | −3.068841 |
| Fe                        | −5.438581 | −0.689082 | −1.123316 |
| P                         | −7.558075 | 0.703565  | −1.322407 |
| O                         | −7.871917 | 2.126155  | −1.096107 |
| O                         | −8.823595 | −0.174504 | −1.801731 |
| O                         | −6.348381 | 0.308550  | −2.329083 |
| O                         | −6.871095 | −0.176410 | −0.144345 |
| H                         | −9.617118 | 0.382964  | −1.884165 |
| FePO <sub>4</sub> H+O+PDO |           |           |           |
| C                         | −0.459017 | 0.888779  | −2.332791 |
| C                         | −0.186257 | −0.590793 | −2.574791 |
| C                         | 1.166262  | −0.777661 | −3.286328 |
| O                         | −0.834161 | 1.395460  | −1.288915 |
| O                         | −0.193735 | −1.328856 | −1.378071 |
| H                         | −1.770602 | 1.049327  | 0.182562  |
| H                         | −0.298563 | 1.533408  | −3.221856 |
| H                         | −0.986433 | −0.908662 | −3.266889 |
| H                         | 1.297519  | −1.834711 | −3.528071 |
| H                         | 1.212523  | −0.198469 | −4.214650 |
| H                         | 1.984729  | −0.468783 | −2.629873 |
| Fe                        | −1.586357 | −2.300316 | −0.917369 |
| P                         | −2.864439 | −0.771947 | 0.582904  |
| O                         | −2.449154 | 0.737970  | 0.840092  |
| O                         | −4.178908 | −0.915679 | 1.466591  |
| O                         | −3.049004 | −1.064356 | −0.939679 |
| O                         | −1.805981 | −1.836768 | 0.954188  |
| H                         | −4.570118 | −0.065648 | 1.735070  |
| O                         | −1.672805 | −3.747596 | −1.481024 |
| FePO <sub>4</sub> H+OPO   |           |           |           |
| C                         | 1.542085  | −1.130946 | −0.870611 |
| C                         | 1.488932  | 0.313012  | −1.298646 |

|                           |           |           |           |
|---------------------------|-----------|-----------|-----------|
| C                         | 2.492617  | 0.915020  | −2.230360 |
| O                         | 0.552659  | −1.385564 | 0.078405  |
| O                         | 0.568168  | 0.998099  | −0.814370 |
| H                         | 2.546435  | −1.363884 | −0.477807 |
| H                         | 1.410416  | −1.764910 | −1.765246 |
| H                         | 3.342630  | 1.270269  | −1.633697 |
| H                         | 2.873304  | 0.177721  | −2.942012 |
| H                         | 2.061902  | 1.772015  | −2.751285 |
| Fe                        | −0.583501 | −0.046117 | 0.472423  |
| P                         | −2.675754 | 0.334950  | 1.834458  |
| O                         | −2.957288 | 0.870837  | 3.182499  |
| O                         | −4.022535 | −0.054057 | 1.020191  |
| O                         | −1.807389 | 1.242311  | 0.802493  |
| O                         | −1.687243 | −0.918007 | 1.647566  |
| H                         | −4.806438 | 0.183751  | 1.544597  |
| FePO <sub>4</sub> H+O+OPO |           |           |           |
| C                         | 0.429744  | −0.875519 | −1.439907 |
| C                         | 0.538447  | 0.631384  | −1.500067 |
| C                         | 0.797175  | 1.326431  | −2.798945 |
| O                         | 0.152702  | −1.322695 | −0.136550 |
| O                         | 0.364844  | 1.270170  | −0.451957 |
| H                         | 1.363923  | −1.329700 | −1.805143 |
| H                         | −0.380036 | −1.173523 | −2.122704 |
| H                         | 1.224585  | 2.315283  | −2.624559 |
| H                         | 1.439144  | 0.734735  | −3.456827 |
| H                         | −0.175411 | 1.448567  | −3.292323 |
| Fe                        | −0.210733 | −0.047964 | 1.049385  |
| P                         | −3.049414 | 0.109326  | −0.177905 |
| O                         | −2.066401 | 0.114525  | 1.046466  |
| O                         | −4.264217 | 1.042623  | 0.316737  |
| O                         | −2.426106 | 0.581480  | −1.492121 |
| O                         | −3.589347 | −1.281161 | −0.569067 |
| H                         | −4.069315 | 1.489157  | 1.158112  |
| O                         | 0.780017  | 0.504382  | 2.124575  |
| FePO <sub>4</sub> H+PPA   |           |           |           |
| C                         | 1.403431  | −1.568002 | 0.097462  |
| C                         | 1.909997  | −0.198159 | 0.415298  |
| C                         | 2.877300  | 0.313549  | −0.672220 |
| O                         | 0.180347  | −1.745703 | −0.006756 |
| O                         | 0.814958  | 0.669622  | 0.583675  |
| H                         | 2.470435  | −0.277329 | 1.365423  |
| H                         | 2.076472  | −2.425757 | −0.050585 |
| H                         | 3.204045  | 1.316504  | −0.389559 |
| H                         | 3.757210  | −0.331980 | −0.764386 |
| H                         | 2.368443  | 0.375007  | −1.638041 |
| Fe                        | −0.799962 | −0.077288 | 0.331791  |
| P                         | −2.887458 | 0.515553  | 0.083466  |
| O                         | −2.015467 | 1.644969  | 0.670440  |
| O                         | −4.423540 | 0.816747  | −0.203274 |
| O                         | −2.010712 | 0.061182  | −1.171443 |
| O                         | −2.597719 | −0.713136 | 1.007749  |
| H                         | −4.623280 | 1.768522  | −0.256242 |
| FePO <sub>4</sub> H+O+PPA |           |           |           |
| C                         | 1.609983  | −1.503286 | 0.047330  |
| C                         | 1.807717  | −0.027721 | 0.221455  |
| C                         | 2.327718  | 0.645560  | −1.060145 |
| O                         | 0.520372  | −2.004647 | 0.321531  |

|                            |           |           |           |
|----------------------------|-----------|-----------|-----------|
| O                          | 0.588270  | 0.561062  | 0.633218  |
| H                          | 2.557785  | 0.098958  | 1.023002  |
| H                          | 2.426597  | −2.144590 | −0.319546 |
| H                          | 2.430660  | 1.716696  | −0.874113 |
| H                          | 3.306992  | 0.245028  | −1.341547 |
| H                          | 1.627520  | 0.498995  | −1.887044 |
| Fe                         | −0.734357 | −0.531966 | 1.064178  |
| P                          | −3.011003 | 0.284988  | 0.259670  |
| O                          | −1.937511 | 0.884703  | 1.284660  |
| O                          | −2.967912 | 1.245770  | −1.039503 |
| O                          | −2.005902 | −0.992051 | −0.081719 |
| O                          | −4.386832 | −0.058399 | 0.642759  |
| H                          | −2.130534 | 1.735796  | −1.110937 |
| O                          | −0.755263 | −1.181596 | 2.489952  |
| FePO <sub>4</sub> H+MeGO   |           |           |           |
| C                          | 2.337906  | −1.972785 | 1.203490  |
| C                          | 2.664092  | −0.780015 | 2.008821  |
| C                          | 3.932418  | −0.622316 | 2.785457  |
| O                          | 1.215642  | −1.958747 | 0.647581  |
| O                          | 1.751225  | 0.083621  | 2.016184  |
| H                          | 2.986921  | −2.850548 | 1.119227  |
| H                          | 3.874743  | 0.266563  | 3.415006  |
| H                          | 4.115610  | −1.504814 | 3.408462  |
| H                          | 4.785366  | −0.525374 | 2.102416  |
| Fe                         | 0.229903  | −0.317709 | 0.864067  |
| P                          | −1.880250 | 0.062573  | 1.036549  |
| O                          | −0.930815 | 1.310499  | 1.088656  |
| O                          | −3.447937 | 0.330917  | 1.174734  |
| O                          | −1.432512 | −0.657125 | −0.266828 |
| O                          | −1.209096 | −0.846075 | 2.140634  |
| H                          | −3.658917 | 1.024335  | 1.824543  |
| FePO <sub>4</sub> H+O+MeGO |           |           |           |
| Fe                         | 1.004139  | −1.262654 | 0.121720  |
| P                          | −1.447555 | −0.768061 | −0.161707 |
| O                          | −2.334925 | 0.412828  | −0.186552 |
| O                          | −2.245311 | −2.160842 | −0.374626 |
| O                          | −0.186115 | −0.822137 | −1.181348 |
| O                          | −0.489247 | −1.001547 | 1.126983  |
| H                          | −3.196208 | −1.989040 | −0.486608 |
| O                          | 1.688913  | −2.659747 | 0.103141  |
| C                          | 3.363854  | 0.342843  | 0.556816  |
| O                          | 2.144094  | 0.205708  | 0.385499  |
| C                          | 3.876447  | 1.786460  | 0.736094  |
| O                          | 3.138527  | 2.739675  | 0.712801  |
| C                          | 4.359987  | −0.765292 | 0.602090  |
| H                          | 4.970932  | 1.874083  | 0.886911  |
| H                          | 3.893072  | −1.741139 | 0.466409  |
| H                          | 5.118119  | −0.602245 | −0.175248 |
| H                          | 4.891578  | −0.735192 | 1.562324  |
| FePO <sub>4</sub> H+HA     |           |           |           |
| C                          | 1.528555  | −1.175981 | −0.852258 |
| C                          | 1.514359  | 0.324060  | −0.527125 |
| C                          | 1.317957  | 1.305725  | −1.642048 |
| O                          | 0.941786  | −1.806070 | 0.323467  |
| O                          | 1.805338  | 0.678550  | 0.651419  |
| H                          | 2.549918  | −1.550162 | −0.986546 |
| H                          | 0.925221  | −1.383329 | −1.737200 |

|                          |           |           |           |
|--------------------------|-----------|-----------|-----------|
| H                        | 1.468848  | 2.322398  | −1.276999 |
| H                        | 2.021951  | 1.093326  | −2.457281 |
| H                        | 0.301546  | 1.199411  | −2.035566 |
| Fe                       | 0.020505  | −0.144050 | 1.004134  |
| P                        | −2.102991 | 0.262157  | 0.862599  |
| O                        | −1.320872 | 1.449246  | 1.472172  |
| O                        | −3.680042 | 0.465766  | 0.681508  |
| O                        | −1.316545 | −0.044269 | −0.478146 |
| O                        | −1.653807 | −0.980934 | 1.704457  |
| H                        | −3.974475 | 1.330337  | 1.018360  |
| H                        | 0.229749  | −2.417282 | 0.060053  |
| FePO <sub>4</sub> H+O+HA |           |           |           |
| C                        | 0.037142  | −0.523879 | −2.236572 |
| C                        | 0.763427  | 0.603409  | −1.524527 |
| C                        | 1.790215  | 1.379926  | −2.291718 |
| O                        | −0.323107 | −1.549415 | −1.361910 |
| O                        | 0.566987  | 0.897862  | −0.332406 |
| H                        | 0.705112  | −0.894426 | −3.028603 |
| H                        | −0.823693 | −0.051935 | −2.737729 |
| H                        | 2.013404  | 2.327251  | −1.800121 |
| H                        | 2.706611  | 0.778662  | −2.348704 |
| H                        | 1.452880  | 1.545830  | −3.320115 |
| Fe                       | −0.831383 | 0.596270  | 0.909875  |
| P                        | −2.945497 | −0.494955 | 0.080650  |
| O                        | −2.200970 | 0.882542  | −0.296309 |
| O                        | −4.370904 | −0.189985 | 0.753431  |
| O                        | −3.083898 | −1.474446 | −1.030273 |
| O                        | −1.879642 | −0.861484 | 1.239032  |
| H                        | −4.319114 | 0.421740  | 1.509022  |
| O                        | −0.605449 | 1.474720  | 2.172243  |
| H                        | −1.294521 | −1.721887 | −1.410065 |
| FePO <sub>4</sub> H+FD   |           |           |           |
| Fe                       | 0.218522  | −1.058340 | 0.549046  |
| P                        | −1.665241 | −0.278368 | −0.105437 |
| O                        | −0.888688 | 0.523798  | 1.017000  |
| O                        | −3.045778 | 0.350110  | −0.609484 |
| O                        | −0.507158 | −0.398324 | −1.178436 |
| O                        | −1.769405 | −1.704915 | 0.475524  |
| H                        | −2.955040 | 1.248384  | −0.972019 |
| C                        | 2.117778  | 0.906638  | 0.053598  |
| O                        | 1.951329  | −0.231800 | 0.502787  |
| H                        | 3.130441  | 1.330079  | 0.052160  |
| H                        | 1.268440  | 1.480438  | −0.335139 |

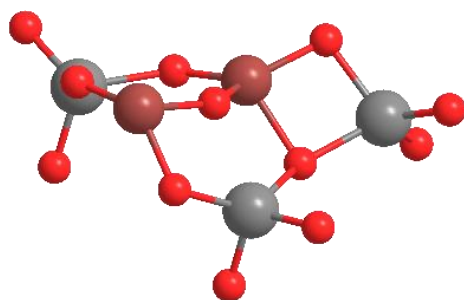

**Figure S3.** Calculated structure of iron molybdate ( $\text{Fe}_2(\text{MoO}_4)_3$ ).

**Table S2.** DFT-optimized Cartesian coordinates for the main  $\text{Fe}_2(\text{MoO}_4)_3$ -based models.

| Element                                    | X         | Y         | Z         |
|--------------------------------------------|-----------|-----------|-----------|
| $\text{Fe}_2(\text{MoO}_4)_3$              |           |           |           |
| Mo                                         | 0.174485  | −1.731996 | 0.936697  |
| Fe                                         | 3.398447  | −1.877739 | 0.543483  |
| O                                          | −0.466200 | −1.326343 | −0.602810 |
| O                                          | 1.982887  | −1.023392 | 1.068315  |
| O                                          | −0.848912 | −1.082973 | 2.145065  |
| O                                          | 0.307871  | −3.625066 | 1.084238  |
| Mo                                         | 5.826907  | −1.380550 | −0.624543 |
| O                                          | 6.383842  | 0.183185  | −1.034499 |
| O                                          | 7.094858  | −2.494315 | −0.899858 |
| O                                          | 5.064077  | −1.508090 | 1.123159  |
| O                                          | 4.029335  | −1.862803 | −1.292628 |
| Mo                                         | 3.030129  | −3.548249 | −2.123999 |
| O                                          | 2.190309  | −2.734460 | −3.367425 |
| O                                          | 2.830207  | −3.440750 | 0.085816  |
| O                                          | 1.781780  | −4.890835 | −1.487876 |
| O                                          | 4.320574  | −4.394877 | −2.857430 |
| Fe                                         | 1.507505  | −4.610568 | 0.241806  |
| $\text{Fe}_2(\text{MoO}_4)_3 + \text{O}_2$ |           |           |           |
| Mo                                         | −2.488270 | 0.675963  | 0.963609  |
| Fe                                         | 0.149837  | 0.162428  | 2.265839  |
| O                                          | −2.529429 | 1.850446  | −0.268175 |
| O                                          | −1.245758 | 1.113630  | 2.485388  |
| O                                          | −3.986794 | 0.795167  | 1.781313  |
| O                                          | −2.622879 | −1.219138 | 0.301480  |
| Mo                                         | 2.260370  | 1.241070  | 0.079654  |
| O                                          | 1.317726  | 2.506462  | −0.573796 |
| O                                          | 3.863122  | 1.818909  | 0.187315  |
| O                                          | 1.678189  | 0.866436  | 1.896537  |
| O                                          | 2.225493  | −0.292126 | −1.071862 |
| Mo                                         | 0.946004  | −1.236269 | −2.136796 |
| O                                          | −0.006922 | −0.143137 | −3.039873 |
| O                                          | −0.381399 | −0.188185 | 0.558195  |
| O                                          | −0.208133 | −2.362786 | −1.056675 |
| O                                          | 1.751634  | −2.245699 | −3.253955 |
| Fe                                         | −1.050928 | −1.871904 | 0.363499  |
| O                                          | −0.542208 | −2.410792 | 1.918030  |
| O                                          | 0.018945  | −1.470496 | 2.796083  |
| $\text{Fe}_2(\text{MoO}_4)_3 + \text{O}$   |           |           |           |
| Mo                                         | −2.678957 | 0.451253  | 1.025184  |
| Fe                                         | 0.504555  | 0.273838  | 1.266690  |
| O                                          | −2.692653 | 0.908153  | −0.633724 |
| O                                          | −0.922074 | 0.992646  | 1.799728  |
| O                                          | −4.043579 | 1.086332  | 1.839257  |
| O                                          | −2.501575 | −1.392615 | 1.210151  |
| Mo                                         | 2.587862  | 1.597827  | 0.123803  |
| O                                          | 2.559277  | 3.300785  | 0.029417  |
| O                                          | 4.119602  | 1.071145  | −0.406475 |
| O                                          | 2.050658  | 0.904676  | 1.846872  |
| O                                          | 0.974140  | 0.670310  | −0.544246 |
| Mo                                         | 0.433467  | −1.107208 | −1.593380 |
| O                                          | 0.034393  | −0.355297 | −3.075460 |
| O                                          | 0.283929  | −1.348552 | 0.697239  |
| O                                          | −1.030138 | −2.260647 | −1.215636 |
| O                                          | 1.855748  | −2.007586 | −1.888040 |

|                                                        |           |           |            |
|--------------------------------------------------------|-----------|-----------|------------|
| Fe                                                     | −1.206457 | −2.471774 | 0.566687   |
| O                                                      | −1.174199 | −3.912289 | 1.118934   |
| Fe <sub>2</sub> (MoO <sub>4</sub> ) <sub>3</sub> +PG   |           |           |            |
| Mo                                                     | −3.662732 | 2.009633  | −9.536199  |
| Fe                                                     | −0.616234 | 1.511831  | −9.876891  |
| O                                                      | −3.647085 | 2.463537  | −11.231549 |
| O                                                      | −1.909396 | 2.261666  | −8.860418  |
| O                                                      | −4.834389 | 2.886279  | −8.644615  |
| O                                                      | −3.947484 | 0.159412  | −9.455362  |
| Mo                                                     | 0.939267  | 3.070825  | −11.507449 |
| O                                                      | 1.190786  | 4.740390  | −11.201487 |
| O                                                      | 1.965365  | 2.598412  | −12.794958 |
| O                                                      | 1.133402  | 1.996013  | −9.923537  |
| O                                                      | −0.917764 | 2.556477  | −11.612153 |
| Mo                                                     | −2.174680 | 1.242798  | −12.787613 |
| O                                                      | −2.986793 | 2.153251  | −13.982938 |
| O                                                      | −1.436962 | 0.299920  | −10.749843 |
| O                                                      | −3.263446 | −0.244905 | −12.273474 |
| O                                                      | −0.864255 | 0.526642  | −13.639409 |
| Fe                                                     | −2.813997 | −0.785429 | −10.584845 |
| C                                                      | −0.853096 | −0.436949 | −7.453808  |
| C                                                      | −1.261101 | −1.824378 | −7.973519  |
| C                                                      | −1.519402 | −2.803071 | −6.830127  |
| O                                                      | −0.034899 | 0.259499  | −8.427467  |
| O                                                      | −2.454137 | −1.774090 | −8.819076  |
| H                                                      | −0.259222 | −0.554868 | −6.544041  |
| H                                                      | −1.724889 | 0.182591  | −7.225067  |
| H                                                      | −0.475986 | −2.198214 | −8.633551  |
| H                                                      | −1.872702 | −3.756907 | −7.228500  |
| H                                                      | −0.599213 | −2.983832 | −6.266287  |
| H                                                      | −2.273536 | −2.418406 | −6.133097  |
| H                                                      | 0.765906  | 0.645529  | −8.030176  |
| H                                                      | −3.199126 | −1.411256 | −8.295643  |
| Fe <sub>2</sub> (MoO <sub>4</sub> ) <sub>3</sub> +O+PG |           |           |            |
| Mo                                                     | −2.684097 | 1.793588  | −1.037340  |
| Fe                                                     | −0.154765 | 0.920673  | 0.656558   |
| O                                                      | −3.553059 | 3.130982  | −1.655762  |
| O                                                      | −1.187288 | 2.282451  | −0.080869  |
| O                                                      | −3.668620 | 0.871549  | 0.098288   |
| O                                                      | −2.057526 | 0.580279  | −2.400278  |
| Mo                                                     | 2.250627  | 2.286917  | −1.041124  |
| O                                                      | 1.221190  | 3.111780  | −2.142163  |
| O                                                      | 3.632235  | 3.257538  | −0.750923  |
| O                                                      | 1.373469  | 1.908193  | 0.569921   |
| O                                                      | 2.702060  | 0.549091  | −1.807794  |
| Mo                                                     | 2.046782  | −1.219698 | −1.902517  |
| O                                                      | 3.122305  | −2.108532 | −2.882769  |
| O                                                      | 0.045709  | −0.062407 | −0.713525  |
| O                                                      | 0.333838  | −1.355546 | −2.781446  |
| O                                                      | 2.060739  | −1.956933 | −0.318396  |
| Fe                                                     | −1.074139 | −0.773385 | −1.871365  |
| O                                                      | −1.872680 | −1.917982 | −1.151574  |
| C                                                      | −1.412515 | −1.221292 | 2.052143   |
| C                                                      | −0.010095 | −1.229980 | 2.655054   |
| C                                                      | 0.533804  | −2.625857 | 2.916888   |
| O                                                      | −1.645172 | 0.153018  | 1.628829   |
| O                                                      | 0.869325  | −0.472986 | 1.763765   |

|                                                         |           |           |           |
|---------------------------------------------------------|-----------|-----------|-----------|
| H                                                       | −2.166350 | −1.482944 | 2.800013  |
| H                                                       | −1.497968 | −1.876044 | 1.177607  |
| H                                                       | −0.020757 | −0.640675 | 3.576432  |
| H                                                       | 1.532828  | −2.563341 | 3.355771  |
| H                                                       | −0.114844 | −3.154285 | 3.622730  |
| H                                                       | 0.592436  | −3.212842 | 1.995049  |
| H                                                       | −2.556769 | 0.306407  | 1.214537  |
| H                                                       | 1.332295  | −1.077234 | 1.124657  |
| Fe <sub>2</sub> (MoO <sub>4</sub> ) <sub>3</sub> +PDO   |           |           |           |
| Mo                                                      | −3.012801 | 2.739331  | −0.612618 |
| Fe                                                      | −0.312182 | 2.240176  | 0.777085  |
| O                                                       | −2.588751 | 2.788664  | −2.273617 |
| O                                                       | −1.581826 | 3.397927  | 0.516825  |
| O                                                       | −4.380558 | 3.738644  | −0.392402 |
| O                                                       | −3.454214 | 0.935671  | −0.074274 |
| Mo                                                      | 1.908883  | 2.750462  | −1.598216 |
| O                                                       | 1.695149  | 4.308695  | −2.273635 |
| O                                                       | 3.584879  | 2.399288  | −1.609482 |
| O                                                       | 1.269171  | 2.687526  | 0.223984  |
| O                                                       | 0.891401  | 1.463168  | −2.551151 |
| Mo                                                      | 0.084829  | −0.269283 | −2.225241 |
| O                                                       | 0.080073  | −0.966608 | −3.783610 |
| O                                                       | −0.800397 | 1.013497  | −0.425345 |
| O                                                       | −1.712787 | −0.914836 | −1.609653 |
| O                                                       | 1.208144  | −1.171046 | −1.294787 |
| Fe                                                      | −2.130205 | −0.194048 | −0.122102 |
| C                                                       | −0.253031 | 0.322513  | 2.880387  |
| C                                                       | −0.313992 | −0.842745 | 1.885623  |
| C                                                       | −0.000859 | −2.168141 | 2.586828  |
| O                                                       | −0.498057 | 1.627550  | 2.369284  |
| O                                                       | −1.623709 | −0.984706 | 1.306874  |
| H                                                       | 0.739164  | 0.322930  | 3.349132  |
| H                                                       | −1.010652 | 0.181515  | 3.662479  |
| H                                                       | 0.412771  | −0.680198 | 1.082312  |
| H                                                       | −0.047935 | −2.985870 | 1.864439  |
| H                                                       | 1.007928  | −2.140122 | 3.010586  |
| H                                                       | −0.719638 | −2.366852 | 3.386993  |
| Fe <sub>2</sub> (MoO <sub>4</sub> ) <sub>3</sub> +O+PDO |           |           |           |
| Mo                                                      | −2.409227 | 1.807421  | 0.211632  |
| Fe                                                      | 0.675831  | 1.711800  | 0.063047  |
| O                                                       | −2.894177 | 2.380199  | −1.324856 |
| O                                                       | −0.627023 | 2.745369  | 0.328399  |
| O                                                       | −3.396708 | 2.627773  | 1.338897  |
| O                                                       | −3.127051 | −0.063881 | 0.138109  |
| Mo                                                      | 2.538633  | 2.894692  | −1.652813 |
| O                                                       | 2.262379  | 4.283517  | −2.619846 |
| O                                                       | 4.182171  | 2.434743  | −1.834751 |
| O                                                       | 2.030996  | 3.096714  | 0.105251  |
| O                                                       | 1.152932  | 1.408466  | −1.677903 |
| Mo                                                      | −0.122527 | −0.003421 | −2.564743 |
| O                                                       | −0.491187 | 0.869946  | −3.985585 |
| O                                                       | −0.699145 | 0.301489  | −0.548953 |
| O                                                       | −1.752875 | −1.110008 | −2.248459 |
| O                                                       | 1.055436  | −1.182718 | −2.952799 |
| Fe                                                      | −1.954329 | −1.080713 | −0.551514 |

|                                                         |           |           |           |
|---------------------------------------------------------|-----------|-----------|-----------|
| C                                                       | 0.867462  | −0.092756 | 2.227116  |
| C                                                       | −0.571100 | 0.033727  | 2.748833  |
| C                                                       | −0.894715 | −0.768419 | 3.980986  |
| O                                                       | 1.361455  | 0.974863  | 1.473037  |
| O                                                       | −1.407387 | 0.742041  | 2.207597  |
| H                                                       | 0.941054  | −1.047348 | 1.683330  |
| H                                                       | 1.537495  | −0.184060 | 3.093798  |
| H                                                       | −0.289000 | −2.180879 | 0.573609  |
| H                                                       | −1.971652 | −0.922833 | 4.055721  |
| H                                                       | −0.366079 | −1.726794 | 3.989625  |
| H                                                       | −0.556871 | −0.201177 | 4.857808  |
| O                                                       | −1.229987 | −2.344656 | 0.372224  |
| Fe <sub>2</sub> (MoO <sub>4</sub> ) <sub>3</sub> +OPO   |           |           |           |
| Mo                                                      | −2.916784 | 2.426135  | −0.303774 |
| Fe                                                      | 0.089997  | 1.933769  | 0.589376  |
| O                                                       | −2.885907 | 3.090449  | −1.885046 |
| O                                                       | −1.312843 | 2.944779  | 0.691944  |
| O                                                       | −4.331242 | 2.994290  | 0.477706  |
| O                                                       | −2.887897 | 0.539657  | −0.352564 |
| Mo                                                      | 1.875323  | 2.114273  | −1.969587 |
| O                                                       | 0.747672  | 2.901093  | −2.984483 |
| O                                                       | 3.383999  | 2.853897  | −2.278332 |
| O                                                       | 1.556822  | 2.569373  | −0.078415 |
| O                                                       | 2.085263  | 0.276256  | −2.485063 |
| Mo                                                      | 1.322031  | −1.464967 | −2.238151 |
| O                                                       | 1.799228  | −2.543139 | −3.480272 |
| O                                                       | −0.172949 | 0.945110  | −0.856840 |
| O                                                       | −0.542035 | −1.355409 | −2.153024 |
| O                                                       | 1.866735  | −2.080630 | −0.707523 |
| Fe                                                      | −1.388176 | −0.332633 | −0.891894 |
| C                                                       | 0.724600  | −0.538045 | 1.849995  |
| C                                                       | −0.350001 | −1.583049 | 1.553920  |
| C                                                       | −0.343635 | −2.831196 | 2.376355  |
| O                                                       | 0.279161  | 0.795099  | 1.901049  |
| O                                                       | −1.197000 | −1.460664 | 0.654406  |
| H                                                       | 1.506986  | −0.705509 | 1.095046  |
| H                                                       | 1.162979  | −0.758140 | 2.830946  |
| H                                                       | −1.049133 | −3.563476 | 1.984172  |
| H                                                       | 0.671158  | −3.246729 | 2.386613  |
| H                                                       | −0.596350 | −2.578593 | 3.413439  |
| Fe <sub>2</sub> (MoO <sub>4</sub> ) <sub>3</sub> +O+OPO |           |           |           |
| Mo                                                      | −2.904336 | 2.358035  | −0.242391 |
| Fe                                                      | 0.403554  | 1.749076  | 0.032619  |
| O                                                       | −3.824589 | 3.283448  | −1.351455 |
| O                                                       | −1.076427 | 2.709726  | −0.413351 |
| O                                                       | −3.484937 | 2.697538  | 1.336901  |
| O                                                       | −3.080173 | 0.445942  | −0.636051 |
| Mo                                                      | 2.421537  | 2.973625  | −1.435910 |
| O                                                       | 2.158070  | 4.272327  | −2.521920 |
| O                                                       | 4.115157  | 2.767756  | −1.262695 |
| O                                                       | 1.553177  | 3.202718  | 0.223603  |
| O                                                       | 1.388611  | 1.335550  | −1.748099 |
| Mo                                                      | 0.390811  | −0.287562 | −2.481139 |
| O                                                       | 0.041880  | 0.291465  | −4.052254 |
| O                                                       | −0.326327 | 0.065527  | −0.485749 |

|                                                         |           |           |           |
|---------------------------------------------------------|-----------|-----------|-----------|
| O                                                       | −1.315074 | −1.311329 | −2.153477 |
| O                                                       | 1.591455  | −1.492948 | −2.632511 |
| Fe                                                      | −1.893516 | −0.800300 | −0.613214 |
| C                                                       | 0.931392  | −0.233826 | 2.059671  |
| C                                                       | −0.518997 | −0.141879 | 2.878399  |
| C                                                       | −0.650019 | −1.218993 | 3.928116  |
| O                                                       | 1.282638  | 0.937189  | 1.544576  |
| O                                                       | −1.313872 | 0.695422  | 2.590496  |
| H                                                       | 0.625527  | −0.994609 | 1.318999  |
| H                                                       | 1.657639  | −0.606040 | 2.794173  |
| H                                                       | −0.068068 | −0.915631 | 4.805170  |
| H                                                       | −1.701646 | −1.324528 | 4.197461  |
| H                                                       | −0.246021 | −2.162272 | 3.552834  |
| O                                                       | −1.884445 | −1.826422 | 0.574199  |
| Fe <sub>2</sub> (MoO <sub>4</sub> ) <sub>3</sub> +PPA   |           |           |           |
| Mo                                                      | −2.651794 | 2.296464  | −0.653183 |
| Fe                                                      | 0.237873  | 1.702631  | 0.431373  |
| O                                                       | −2.161538 | 2.803355  | −2.217969 |
| O                                                       | −1.295103 | 2.623634  | 0.630583  |
| O                                                       | −4.086553 | 3.133888  | −0.239074 |
| O                                                       | −2.950523 | 0.367252  | −0.643071 |
| Mo                                                      | 2.198816  | 2.256402  | −2.257822 |
| O                                                       | 1.703889  | 3.626112  | −3.158549 |
| O                                                       | 3.912294  | 2.206148  | −2.292598 |
| O                                                       | 1.626680  | 2.392195  | −0.452059 |
| O                                                       | 1.445633  | 0.650526  | −3.006981 |
| Mo                                                      | 0.831738  | −1.075851 | −2.469855 |
| O                                                       | 1.098948  | −2.078822 | −3.825750 |
| O                                                       | −0.185609 | 0.433837  | −0.739317 |
| O                                                       | −1.041658 | −1.490104 | −2.029452 |
| O                                                       | 1.822916  | −1.690344 | −1.199327 |
| Fe                                                      | −1.566757 | −0.677303 | −0.591840 |
| C                                                       | −0.025237 | −0.376763 | 2.551637  |
| C                                                       | −0.036054 | −1.558110 | 1.582683  |
| C                                                       | 0.107647  | −2.887878 | 2.315610  |
| O                                                       | 0.074371  | 0.806427  | 2.221107  |
| O                                                       | −1.286811 | −1.551522 | 0.890102  |
| H                                                       | −0.122976 | −0.584631 | 3.629856  |
| H                                                       | 0.792177  | −1.421185 | 0.873810  |
| H                                                       | 0.132316  | −3.702769 | 1.589441  |
| H                                                       | 1.044117  | −2.906374 | 2.884691  |
| H                                                       | −0.730800 | −3.052218 | 2.998954  |
| Fe <sub>2</sub> (MoO <sub>4</sub> ) <sub>3</sub> +O+PPA |           |           |           |
| Mo                                                      | −2.916566 | 1.176285  | −0.331708 |
| Fe                                                      | 0.140190  | 0.980784  | 0.151559  |
| O                                                       | −2.559127 | 1.731903  | −1.937173 |
| O                                                       | −1.459646 | 1.611491  | 0.773466  |
| O                                                       | −4.346065 | 1.907450  | 0.258840  |
| O                                                       | −3.130795 | −0.742324 | −0.502233 |
| Mo                                                      | 1.719678  | 3.049088  | −0.769966 |
| O                                                       | 1.273095  | 4.687814  | −0.529681 |
| O                                                       | 3.298253  | 3.011173  | −1.437101 |
| O                                                       | 1.554825  | 2.010331  | 0.798542  |
| O                                                       | 0.363016  | 1.919569  | −1.613292 |
| Mo                                                      | −0.314649 | 0.525545  | −2.991445 |
| O                                                       | −0.907280 | 1.489346  | −4.271917 |
| O                                                       | −0.486697 | −0.314479 | −0.980535 |

|                                                          |           |           |           |
|----------------------------------------------------------|-----------|-----------|-----------|
| O                                                        | −1.615334 | −1.034402 | −2.986489 |
| O                                                        | 1.133582  | −0.160112 | −3.580160 |
| Fe                                                       | −1.814486 | −1.500927 | −1.358626 |
| C                                                        | 0.615478  | −1.218182 | 3.809329  |
| C                                                        | 0.340810  | 0.000909  | 2.890103  |
| C                                                        | 0.179274  | 1.333065  | 3.536555  |
| O                                                        | 0.681704  | −2.340597 | 3.372549  |
| O                                                        | 0.296577  | −0.236542 | 1.680955  |
| H                                                        | 0.742138  | −0.982906 | 4.884594  |
| H                                                        | −0.224555 | −2.684460 | −0.287449 |
| H                                                        | −0.257066 | 2.064328  | 2.859611  |
| H                                                        | −0.421514 | 1.235769  | 4.448095  |
| H                                                        | 1.175270  | 1.681557  | 3.844558  |
| O                                                        | −1.068111 | −2.907475 | −0.736985 |
| Fe <sub>2</sub> (MoO <sub>4</sub> ) <sub>3</sub> +MeGO   |           |           |           |
| Mo                                                       | −2.505502 | 2.150071  | −1.076351 |
| Fe                                                       | 0.105110  | 1.594088  | 0.505421  |
| O                                                        | −1.876449 | 2.104635  | −2.674193 |
| O                                                        | −1.202983 | 2.722056  | 0.211959  |
| O                                                        | −3.856631 | 3.195237  | −1.048812 |
| O                                                        | −3.026364 | 0.366702  | −0.499084 |
| Mo                                                       | 2.234579  | 2.306322  | −1.850441 |
| O                                                        | 1.554782  | 3.675501  | −2.625361 |
| O                                                        | 3.940309  | 2.455163  | −1.907009 |
| O                                                        | 1.651978  | 2.199025  | −0.017957 |
| O                                                        | 1.623796  | 0.696348  | −2.638788 |
| Mo                                                       | 0.508790  | −0.874412 | −2.446093 |
| O                                                        | 0.235584  | −1.303587 | −4.077150 |
| O                                                        | −0.310877 | 0.319666  | −0.710042 |
| O                                                        | −1.315792 | −1.591896 | −1.784355 |
| O                                                        | 1.547248  | −2.070296 | −1.798570 |
| Fe                                                       | −1.736250 | −0.778755 | −0.379326 |
| C                                                        | 0.303623  | −0.365442 | 2.400757  |
| C                                                        | −0.337467 | −1.524920 | 1.976969  |
| C                                                        | 0.120000  | −2.880584 | 2.428510  |
| O                                                        | −0.102118 | 0.855752  | 2.113338  |
| O                                                        | −1.412281 | −1.524711 | 1.205301  |
| H                                                        | 1.165718  | −0.444338 | 3.063839  |
| H                                                        | 0.466134  | −3.458059 | 1.563350  |
| H                                                        | 0.930289  | −2.811619 | 3.156934  |
| H                                                        | −0.720226 | −3.424950 | 2.871157  |
| Fe <sub>2</sub> (MoO <sub>4</sub> ) <sub>3</sub> +O+MeGO |           |           |           |
| Mo                                                       | −2.299561 | 1.742462  | 0.027715  |
| Fe                                                       | 0.777277  | 1.418993  | 0.031975  |
| O                                                        | −2.357121 | 1.781316  | −1.704371 |
| O                                                        | −0.547630 | 2.385641  | 0.585375  |
| O                                                        | −3.618706 | 2.591417  | 0.710010  |
| O                                                        | −2.201904 | −0.055816 | 0.539046  |
| Mo                                                       | 2.170012  | 2.886474  | −1.898632 |
| O                                                        | 2.077673  | 4.594187  | −1.882250 |
| O                                                        | 3.382177  | 2.432799  | −3.012665 |
| O                                                        | 2.383738  | 2.123578  | −0.124444 |
| O                                                        | 0.478664  | 1.974394  | −1.977583 |
| Mo                                                       | −0.330070 | 0.260509  | −2.890606 |
| O                                                        | −1.140454 | 0.853178  | −4.271781 |
| O                                                        | 0.351055  | −0.121600 | −0.645589 |
| O                                                        | −1.462260 | −1.062783 | −2.105170 |

|                                                        |           |           |           |
|--------------------------------------------------------|-----------|-----------|-----------|
| O                                                      | 1.054594  | −0.531495 | −3.511762 |
| Fe                                                     | −1.092342 | −1.202935 | −0.346188 |
| C                                                      | 0.796386  | 0.271905  | 2.826216  |
| C                                                      | −0.680162 | 0.360404  | 3.259458  |
| C                                                      | −1.370986 | −0.932010 | 3.588695  |
| O                                                      | 1.295360  | 0.696142  | 1.788677  |
| O                                                      | −1.130595 | 1.478466  | 3.404814  |
| H                                                      | 1.491632  | −0.173144 | 3.559824  |
| H                                                      | −2.429346 | −0.739693 | 3.770580  |
| H                                                      | −1.255382 | −1.664488 | 2.783496  |
| H                                                      | −0.918858 | −1.360478 | 4.493256  |
| O                                                      | −0.942191 | −2.605423 | 0.308904  |
| Fe <sub>2</sub> (MoO <sub>4</sub> ) <sub>3</sub> +HA   |           |           |           |
| Mo                                                     | −2.309050 | 1.034389  | −0.865463 |
| Fe                                                     | 0.718926  | 1.113256  | −0.348855 |
| O                                                      | −1.887107 | 1.122086  | −2.570022 |
| O                                                      | −0.866013 | 1.833630  | 0.093566  |
| O                                                      | −3.825947 | 1.755560  | −0.519351 |
| O                                                      | −2.233691 | −0.738453 | −0.320779 |
| Mo                                                     | 2.508437  | 2.493300  | −1.857949 |
| O                                                      | 2.525055  | 4.208441  | −1.901914 |
| O                                                      | 3.879563  | 1.922873  | −2.710099 |
| O                                                      | 2.357343  | 1.802753  | −0.055050 |
| O                                                      | 0.802491  | 1.715724  | −2.292156 |
| Mo                                                     | 0.060422  | −0.072116 | −3.381025 |
| O                                                      | −0.529804 | 0.357604  | −4.926364 |
| O                                                      | 0.424702  | −0.379608 | −1.085833 |
| O                                                      | −0.884604 | −1.594027 | −2.739488 |
| O                                                      | 1.653562  | −0.641133 | −3.698054 |
| Fe                                                     | −0.739225 | −1.691138 | −0.891074 |
| C                                                      | −0.158050 | −0.216860 | 2.319127  |
| C                                                      | −0.455102 | −1.709402 | 2.127091  |
| C                                                      | −0.715626 | −2.507097 | 3.370391  |
| O                                                      | 0.906602  | 0.219905  | 1.453401  |
| O                                                      | −0.512559 | −2.246699 | 1.018687  |
| H                                                      | 0.119207  | −0.025754 | 3.358305  |
| H                                                      | −1.065207 | 0.353455  | 2.090681  |
| H                                                      | −1.074560 | −3.505356 | 3.119601  |
| H                                                      | 0.208110  | −2.581342 | 3.958134  |
| H                                                      | −1.449872 | −1.990802 | 4.000691  |
| H                                                      | 1.605996  | 0.691812  | 1.940806  |
| Fe <sub>2</sub> (MoO <sub>4</sub> ) <sub>3</sub> +O+HA |           |           |           |
| Mo                                                     | −2.322984 | 1.757731  | −0.665690 |
| Fe                                                     | 0.751707  | 0.893892  | −0.326943 |
| O                                                      | −2.396980 | 2.106582  | −2.351803 |
| O                                                      | −0.512437 | 2.044724  | −0.014704 |
| O                                                      | −3.484948 | 2.718157  | 0.146430  |
| O                                                      | −2.567365 | −0.087026 | −0.387434 |
| Mo                                                     | 2.211360  | 2.095977  | −2.410143 |
| O                                                      | 2.039842  | 3.788208  | −2.579278 |
| O                                                      | 3.451805  | 1.576870  | −3.466087 |
| O                                                      | 2.441461  | 1.551438  | −0.609660 |
| O                                                      | 0.547832  | 1.040647  | −2.429801 |
| Mo                                                     | 0.086106  | −0.609751 | −3.462638 |
| O                                                      | −0.127693 | −0.320465 | −5.132736 |
| O                                                      | 0.055532  | −0.660741 | −0.254499 |
| O                                                      | −1.461237 | −1.289322 | −2.680750 |

|                                                      |           |           |           |
|------------------------------------------------------|-----------|-----------|-----------|
| O                                                    | 1.391653  | −1.710261 | −3.284762 |
| Fe                                                   | −1.444746 | −1.389108 | −0.878464 |
| C                                                    | 1.136455  | −0.405570 | 2.361035  |
| C                                                    | −0.328406 | −0.571264 | 2.781281  |
| C                                                    | −0.678766 | −1.927993 | 3.349305  |
| O                                                    | 1.296838  | 0.796676  | 1.568104  |
| O                                                    | −1.125117 | 0.334337  | 2.650442  |
| H                                                    | 1.480931  | −1.281225 | 1.802997  |
| H                                                    | 1.747570  | −0.289796 | 3.263611  |
| H                                                    | −1.586762 | −1.850586 | 3.949354  |
| H                                                    | −0.869360 | −2.615171 | 2.515555  |
| H                                                    | 0.135946  | −2.350409 | 3.947715  |
| O                                                    | −1.742344 | −2.767489 | −0.223496 |
| H                                                    | 2.232105  | 1.078937  | 1.563059  |
| Fe <sub>2</sub> (MoO <sub>4</sub> ) <sub>3</sub> +FD |           |           |           |
| Mo                                                   | −2.051516 | 0.640811  | 1.303324  |
| Fe                                                   | 0.997665  | 0.220121  | 1.291314  |
| O                                                    | −1.915149 | 0.946690  | −0.423259 |
| O                                                    | −0.406023 | 1.131358  | 2.042645  |
| O                                                    | −3.336835 | 1.530576  | 1.996128  |
| O                                                    | −2.284599 | −1.251164 | 1.479486  |
| Mo                                                   | 2.766397  | 1.630498  | −0.278140 |
| O                                                    | 3.023172  | 3.316531  | −0.097270 |
| O                                                    | 3.926989  | 1.018592  | −1.378758 |
| O                                                    | 2.750393  | 0.710699  | 1.401267  |
| O                                                    | 0.914856  | 1.121014  | −0.569020 |
| Mo                                                   | −0.189459 | −0.214771 | −1.754202 |
| O                                                    | −0.881983 | 0.637323  | −3.057636 |
| O                                                    | 0.208598  | −1.061172 | 0.427741  |
| O                                                    | −1.355492 | −1.747465 | −1.320438 |
| O                                                    | 1.160240  | −1.003176 | −2.455506 |
| Fe                                                   | −1.186293 | −2.103438 | 0.382132  |
| C                                                    | 1.783905  | −0.337020 | 3.932494  |
| O                                                    | 1.180624  | −0.787157 | 2.961767  |
| H                                                    | 2.254034  | 0.654055  | 3.907065  |
| H                                                    | 1.853476  | −0.951906 | 4.839866  |

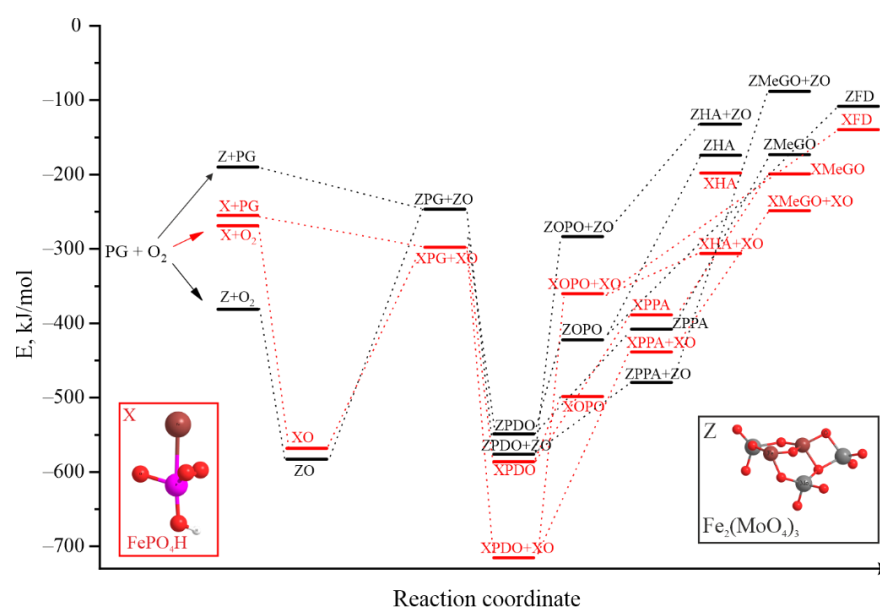

**Figure S4.** Interactions of key reagents, intermediates and products with active sites along the reaction coordinate (B3LYP/DGDZVP level of theory).
